# Supplementary material
Source: publisher site journal article supplement (https://www.dovepress.com/get_supplementary_file.php?f=259151.docx)
Supplement: Supplementary file 1 [file get_supplementary_file.php]

| **Example of how to use the PSFS**  **in collaborative development of rehabilitation goals** |
| --- |
| **1. Get to know the patients preferences**  **Examples of questions asked:**  -Can you tell me about your life before you got the ABI diagnose?  -What did your everyday life look like? |
| **2. Develop long-term goals**  **Examples of questions asked:**  -What is important for you now in your situation with an ABI diagnose?  - What do you want to gain as a result of the rehabilitation?  **Examples of patients answers:**  -To be independent in the activities of daily living.  -To be able to work again. |
| **3. Introduction of the PSFS**  -The health professionals informed the patients that we use the PSFS to measure the patients` opinion of their own function and as a tool to develop collaborative rehabilitation goals. |
| **4. Develop short-term goals**  The health professionals guide the patients to transform the long-term goals to specific and short term goals, which could be an activity in the PSFS.  **Examples of questions asked:**  What activities are important to you, but are difficult to perform due to your health condition?  What does it take to be able to perform this activity?  What will be the first thing you have to master to be able to perform this activity?  **Examples of patients answers:**  Remember appointments, find the way at the mall, write text messages, go to the bank online, conversate, go upstairs, go to the store, go to the toilet alone, get dressed, clean the house, make dinner, go to the gym, join the grandchildren at a soccer game, knit.  **Abbreviations:** PSFS, Patient-Specific Functional Scale |

**Appendix**
